# Supplementary material for: Carbohydrate Mouth Rinsing Reduces Dental Anxiety in Children at Their First Dental Visit: A Randomized Trial Supported by Salivary Cortisol
Source: Research Square preprint supplement (doi:10.21203/rs.3.rs-8354823/v1), 2026-01-08
Supplement: Supplementary file 1 [file dc4b3b51f0a9f8d9f8c81ebe.docx]

**Supplementary Appendix A**

**Detailed Study Procedure Timeline**

**Overview**

This appendix provides a detailed description of the standardized study timeline implemented to ensure methodological rigor, minimize biological and procedural variability, and preserve the validity of salivary cortisol measurements in children aged 7–9 years. The protocol was specifically designed to control for anticipatory stress, diurnal cortisol variation, and potential oral contamination associated with the mouth-rinsing intervention.

**Step-by-Step Procedure**

**Acclimatization Period (−15 to −10 minutes)**

Upon arrival at the clinic, each child was seated in a quiet, neutral environment for a standardized acclimatization period lasting approximately 5 minutes. During this time, children engaged in calm, non-dental activities (e.g., drawing or neutral conversation). This step was implemented to stabilize hypothalamic–pituitary–adrenal (HPA) axis activity prior to baseline assessment.

**Baseline Saliva Collection (T0; −10 minutes)**

Unstimulated saliva was collected using a pediatric-appropriate method with the child seated upright. Children were instructed to avoid speaking or orofacial movement during collection. The sample obtained at this time point represented the baseline physiological stress level prior to any study-related intervention.

Immediately after collection, samples were labeled, placed on ice, and transferred for temporary cold storage pending further processing.

**Baseline Anxiety Assessment (−9 to −7 minutes)**

Following baseline saliva collection, situational dental anxiety was assessed using the Facial Image Scale (FIS). Children were asked to select the facial expression that best represented how they felt at that moment. The assessment was completed within 30 seconds and involved no verbal probing to avoid influencing emotional state.

**Mouth-Rinsing Intervention (−7 minutes)**

Children were administered the assigned mouth rinse according to their randomized group allocation. A standardized volume (10–15 mL) of the solution was provided in an identical cup for all participants. Children were instructed to rinse for approximately 10 seconds and then expectorate completely, with explicit instructions not to swallow the solution.

No additional rinsing with water was permitted following expectoration.

**Washout and Stabilization Interval (−6 to −2 minutes)**

Following the mouth-rinsing intervention, children remained seated quietly for a fixed washout interval of approximately 4 minutes. During this period, children were instructed not to speak, drink, or manipulate the oral cavity.

This interval was incorporated to (i) reduce the risk of oral contamination affecting subsequent saliva samples and (ii) allow for central neural responses to oral carbohydrate exposure to occur prior to outcome assessment.

**Post-Rinse Anxiety Assessment (−2 minutes)**

Situational anxiety was reassessed using the Facial Image Scale at a predefined time point following the washout interval. This assessment captured acute changes in emotional state attributable to the mouth-rinsing intervention prior to initiation of the dental procedure.

**Clinical Procedure (0 minutes)**

The standardized dental procedure commenced immediately after post-rinse anxiety assessment. Procedures were limited to a clinical examination with or without dental prophylaxis and were performed using a consistent sequence and scripted communication across all participants to minimize procedural variability.

**Post-Procedure Saliva Collection (T1; +5 to +8 minutes)**

A second unstimulated saliva sample was collected approximately 5–8 minutes after completion of the dental procedure. This time window was selected to capture acute anticipatory and early procedural stress responses while maintaining consistency across participants.

As with baseline samples, saliva was collected with minimal movement and immediately placed on ice following collection.

**Pain Perception Assessment (+9 minutes)**

Immediately following post-procedure saliva collection, children were asked to rate their pain using the Faces Pain Scale–Revised (FPS-R). The assessment was administered without additional explanation beyond standard instructions and required less than one minute to complete.

**Protocol Completion (+10 minutes)**

Following completion of all study-related assessments, routine clinical communication resumed, and children were positively reinforced for their participation. No further data were collected beyond this point.

**Methodological Rationale**

This timeline was designed to:

- ensure physiologically meaningful baseline cortisol measurement,
- minimize oral contamination of saliva samples following the mouth-rinsing intervention,
- capture acute changes in anxiety and stress relevant to first-visit pediatric dental experiences,
- maintain consistency and reproducibility across participants.

**Note to Reviewers**

The detailed timing presented here supplements the summary description provided in the Methods section of the main manuscript and is included to enhance transparency and reproducibility.

All study personnel involved in saliva handling and laboratory analyses were blinded to group allocation throughout the study period.
